# Supplementary material
Source: PubMed Central journal article supplement (PMC2837465)
Supplement: NIHMS172836-supplement-Supp1.pdf [file NIHMS172836-supplement-Supp1.pdf]

## SUPPLEMENTAL MATERIAL

### Statistical Methods.

Figures 1A and 1B have identical structures but, of course, they differ in what was measured. In each case there were three comparisons. The least standard of them was comparing subjects, before and after treatment. This comparison was complicated because while 11 subjects were measured both before and after treatment, 15 subjects were measured only before; and 23 only after. We compared all subjects measured before with all subjects measured after. Thus, the specification is that all subjects before are independent and identically distributed. Likewise, all subjects measured after are assumed independent and identically distributed. However, 11 subjects in each of the two groups were measured both times. Their measurements are assumed independent of those from the other 38 subjects, but their before and after treatment measurements are not independent. We denote the (population) mean value of each before measurement by  $\mu_B$  and the corresponding variance as  $\sigma_B^2$ . Parameters for individual measurements taken after treatment are  $\mu_A$  and  $\sigma_A^2$ . A principal “null hypothesis” is that  $\mu_A = \mu_B$ . The respective variances are examples of “nuisance parameters”

Sampling distributions of ordinary two-sample t-tests are predicated not only on the assumption that all data are normally distributed, but additionally on the assumption that the two variances are equal. There is the additional assumption regarding normality of both sets of distributions. For data in Figures 1A and 1B there are inferences on comparisons of (26) before and (34) after treatment measurements with (the 34) control measurements. These comparisons involve ordinary two-sample t test statistics. Always, control measurements are assumed independent of each other, and of measurements taken before or after treatment. They are assumed to have common mean value  $\mu_C$  and common variance  $\sigma_C^2$ . Thus, when before measurements are compared with control, the null hypothesis is that  $\mu_B = \mu_C$ . Obviously analogous statements can be made regarding a comparison of measurements taken after treatment and controls.

The assumption of normality matters little to any of the three cited comparisons owing to the “central limit effect” (Bickel and Doksum, Section A.2.7, page 464). This is

because there are  $11 + 15 = 26$  measurements before,  $11 + 23 = 34$  after, and 34 control measurements. Each comparison involves a difference in sample mean values divided by an estimate of the standard deviation of that difference. Our estimate of  $\mu_B$  is the mean of all measurements taken before treatment, and is denoted by  $\bar{x}_B$ ; it is computed from all available measurements, 26 for data cited. Our estimate of  $\sigma_B^2$  is the estimated sample variance of these 26 measurements, write  $s_B^2$ . Estimates  $\bar{x}_A$  and  $s_A^2$ , respectively of  $\mu_A$  and  $\sigma_A^2$  are defined analogously from the 34 measurements taken after treatment. The correlation between before and after measurements on the same individual is denoted by  $\rho_{AB}$ . In our application regarding data in Figures 1A and 1B, the estimate computed from data,  $r_{AB}$ , is based only 11 subjects.

Discussion thus far and simple algebra entail that

$$\text{Var} (\bar{x}_A - \bar{x}_B) = \frac{\sigma_B^2}{26} + \frac{\sigma_A^2}{34} - 2\left(\frac{11}{(26)(34)}\right)\rho_{AB} \sigma_A\sigma_B.$$

It follows from Slutkys theorem (Bickel and Doksum, Section A.2.7, page 460) that when the null hypothesis  $\mu_A = \mu_B$  is true, then

$$z = \frac{\bar{x}_A - \bar{x}_B}{\sqrt{\frac{s_B^2}{26} + \frac{s_A^2}{34} - 2\left(\frac{11}{(26)(34)} r_{A,B} s_A s_B\right)}}$$

has, at least approximately, a standard normal distribution. By computing the probability that a standard normal  $Z$  exceeds the observed computed  $z$  in absolute value, one has an approximate attained significance value (p-value) for a two-sided test of the null hypothesis that  $\mu_A = \mu_B$ .

Readers note that regarding data in Figures 1A and 1B, we are testing three separate hypotheses regarding pair-wise equality of the parameters  $\mu_A, \mu_B$ , and  $\mu_C$ . We should not employ a standard one-way analysis of variance, especially but not only because the three sets of observations that comprise  $\bar{x}_A, \bar{x}_B$  and  $\bar{x}_C$  are not independent. However, an overall p-value for the combined tests  $\mu_A = \mu_B$ ;  $\mu_A = \mu_C$ ;  $\mu_B = \mu_C$  can be accomplished

by applying the usual Bonferroni inequality (Bickel and Doksum, pages 288 and 439), and simply adding the p-values. While testing  $\mu_A = \mu_B$  can be accomplished by using the statistic  $z$  we have derived, testing the null hypothesis that  $\mu_B$ , alternatively  $\mu_A$  equals  $\mu_C$  can be accomplished by a two-sample t-test. Assumptions underlying the ordinary test may fail because of inequality of variances, in which case the Behrens-Fisher test, which is analogous to  $z$  (see <http://sekhon.berkeley.edu/stats/html/t.test.html>) can be used. One might also apply the two-sample Wilcoxon statistic for testing  $\mu_B = \mu_C$  or  $\mu_A = \mu_C$  (see <http://stat.ethz.ch/R-manual/R-patched/library/stats/html/wilcox.test.html>). Neither is entirely appropriate since in both cases, the sampling distributions are not identical up to a possible shift of one of them. However, readers please note that all three tests of both null hypotheses have exceedingly small p-values. So it is immaterial which test is employed, and by any reasonable criterion we “reject” not only the two just cited, but even all three null hypotheses.

When it comes to data other than those of Figures 1A and 1B, issues described already are both simpler and more complex. They are simpler because in testing  $\mu_A = \mu_B$  all six subjects that figure in computing  $\bar{x}_A$  and  $\bar{x}_B$  were measured both before and after treatment. Therefore,  $z$  reduces to a simple one-sample t statistic. However, because it has only five degrees of freedom, for the null central t-distribution to apply reasonably accurately, the six differences, after minus before by subject, should appear to have normal distributions. We assessed normality by inspecting so-called q-q plots (<http://sekhon.berkeley.edu/stats/html/qnorm.html>) and also by application of the Wilk-Shapiro statistic (<http://sekhon.berkeley.edu/stats/html/shapiro.test.html>). When distributions appear normal to the extent we can infer that, then one-sample t might be trusted. When they are not, then we prefer the one-sample Wilcoxon statistic (URL already given), though any test of its assumption of symmetry about its center is not testable from so little data. Entirely analogous comments apply to testing  $\mu_B = \mu_C$  and  $\mu_A = \mu_C$  from cited data other than those of Figures 1A and 1B. Here two-sample t has 10 degrees of freedom,

so we are less concerned about normality of data than when we test  $\mu_A = \mu_C$ . Further, when distributions appear non-normal, we have both Behrens-Fisher-Welch t and the two sample Wilcoxon statistic for testing. Testing normality is, obviously, suspect with only six observations, and we are somewhat perplexed which inferences to draw when competitive p-values give somewhat different signals.

### Reference

Bickel, P.J. and Doksum, K.A. (1977), *MATHEMATICAL STATISTICS: Basic Ideas and Selected Topics*, Holden-Day, Inc., San Francisco.

**Supplemental Table 1. Demographic and clinical characteristics of GCA patients and control donors**

| <b>Items</b>                        | <b>Con</b>  | <b>Untreated GCA</b> | <b>Treated GCA</b> |
|-------------------------------------|-------------|----------------------|--------------------|
| <b>No. of subjects</b>              | <b>34</b>   | <b>26</b>            | <b>34</b>          |
| <b>Sex, female/male</b>             | <b>26/8</b> | <b>19/7</b>          | <b>28/6</b>        |
| <b>Age, mean+/-SD years</b>         | <b>72+8</b> | <b>77+7</b>          | <b>73+8</b>        |
| <b>Ethnicity, %</b>                 |             |                      |                    |
| <b>Cauc</b>                         | <b>97</b>   | <b>100</b>           | <b>97</b>          |
| <b>African American</b>             | <b>3</b>    | <b>0</b>             | <b>3</b>           |
| <b>Headache, %</b>                  |             | <b>75</b>            |                    |
| <b>Jaw claudication, %</b>          |             | <b>50</b>            |                    |
| <b>Scalp tenderness, %</b>          |             | <b>50</b>            |                    |
| <b>Ischemic optic neuropathy, %</b> |             | <b>17</b>            |                    |
| <b>Fever, %</b>                     |             | <b>25</b>            |                    |
| <b>Weight loss, %</b>               |             | <b>33</b>            |                    |
| <b>Fatigue, %</b>                   |             | <b>75</b>            |                    |
| <b>Anemia, %</b>                    |             | <b>50</b>            |                    |
| <b>Polymyalgia rheumatica, %</b>    |             | <b>42</b>            |                    |
| <b>ESR+/-SD</b>                     |             | <b>81+20</b>         | <b>31+7</b>        |
| <b>CRP+/-SD</b>                     |             | <b>80.7+24</b>       | <b>15.7+5</b>      |
| <b>Platelets+/-SD</b>               |             | <b>350+143</b>       | <b>293+75</b>      |

**Supplemental Table 2. Reagents and antibodies utilized in cell culture and staining**

| <b>Reagents/Antibodies</b>             | <b>Company</b>                           | <b>Usage</b>    | <b>Concentration or Dilution</b> |
|----------------------------------------|------------------------------------------|-----------------|----------------------------------|
| LPS                                    | Sigma-Aldrich, St. Louis, MO             | Cell culture    | 1µg/ml                           |
| Goat anti-human IL-1β                  | R&D Systems, Minneapolis, MN             | Cell culture    | 2µg/ml                           |
| Goat anti-human IL-6                   | R&D Systems                              | Cell culture    | 4µg/ml                           |
| Goat anti-human IL-23p19               | R&D Systems                              | Cell culture    | 6µg/ml                           |
| Purified goat IgG control              | R&D Systems                              | Cell culture    | 6µg/ml                           |
| Mouse anti-human IL-4                  | R&D Systems                              | Cell culture    | 2µg/ml                           |
| Mouse anti-human IFN-γ                 | R&D Systems                              | Cell culture    | 2µg/ml                           |
| Anti-human CD3 (OKT)                   | Ortho Biotech, Raritan, NJ               | Cell culture    | 1µg/ml                           |
| Anti-human CD45RA microbeads           | Miltenyi Biotec, Auburn, CA              | Purification    | See company instruction          |
| Anti-human CD45RO microbeads           | Miltenyi Biotec                          | Purification    | See company instruction          |
| phorbol 12-myristate 13-acetate (PMA)  | Sigma-Aldrich                            | Cell culture    | 50µg/ml                          |
| Ionomycin                              | Sigma-Aldrich                            | Cell culture    | 1µg/ml                           |
| Brefeldin A                            | eBioscience, San Diego, CA               | Cell culture    | 3µg/ml                           |
| FITC-conjugated mouse anti-human CD3   | BD, San Diego, CA                        | Cell staining   | 1:100                            |
| PE-conjugated mouse anti-human CD3     | BD                                       | Cell staining   | 1:100                            |
| PerCP-conjugated mouse anti-human CD4  | BD                                       | Cell staining   | 1:100                            |
| FITC-conjugated mouse anti-human IFN-γ | BD, Pharmingen, San Jose, CA             | Cell staining   | 1:100                            |
| APC-conjugated mouse anti-human IL-17  | eBioscience, San Diego, CA               | Cell staining   | 1:50                             |
| PE-conjugated mouse anti-human Foxp3   | BD, Pharmingen                           | Cell staining   | 1:25                             |
| Mouse anti-human CD3                   | Dako, Carpinteria, CA                    | Tissue staining | 1:100                            |
| Mouse anti-human CD4                   | Neuromics, Edina, MN                     | Tissue staining | 1:100                            |
| Mouse anti-human CD8                   | Dako                                     | Tissue staining | 1:100                            |
| Mouse anti-human CD14                  | Santa Cruz Biotechnology, Santa Cruz, CA | Tissue staining | 1:100                            |
| Mouse anti-human CD15                  | Dako                                     | Tissue staining | 1:100                            |
| Purified mouse IgG control             | Innovative Research, Southfield, MI      | Tissue staining | 1:100                            |
| Rabbit anti-human IL-17                | Santa Cruz Biotechnology                 | Tissue staining | 1:100                            |
| Rabbit anti-human IFN-γ                | Santa Cruz Biotechnology                 | Tissue staining | 1:100                            |
| Purified Rabbit IgG isotype control    | IMGENEX, San Diego, CA                   | Tissue staining | 1:100                            |

**Supplemental Table 3. Primer pairs utilized in quantitative RT-PCR assays\***

| <b>Gene</b>                     | <b>Sense (5'-3')</b>     | <b>Anti-sense (5'-3')</b> |
|---------------------------------|--------------------------|---------------------------|
| <b>IL-17</b>                    | AACCGATCCACCTCACCTTGGAAT | TTCATGTGGTAGTCCACGTTCCCA  |
| <b>IFN-<math>\gamma</math></b>  | ACTAGGCAGCCAACCTAAGCAAGA | CATCAGGGTCACCTGACACATTCA  |
| <b>Foxp3</b>                    | TTCAAGTTCCACAACATGCGACCC | GCACAAAGCACTTGTGCAGACTCA  |
| <b>IL-1<math>\beta</math></b>   | AAGTACCTGAGCTCGCCAGTGAAA | TTGCTGTAGTGGTGGTCGGAGATT  |
| <b>IL-6</b>                     | AGCCACTCACCTCTTCAGAACGAA | AGTGCCTCTTTGCTGCTTTCACAC  |
| <b>IL-23p19</b>                 | ACTCAGCAGATTCCAAGCCTCAGT | TGGAGATCTGAGTGCCATCCTTGA  |
| <b>IL-12p35</b>                 | TAACTAATGGGAGTTGCCTGGCCT | AGGGCCTGCATCAGCTCATCAATA  |
| <b>IL-12p40</b>                 | TCATCAAACCTGACCCACCCAAGA | TTTCTCTCTTGCTCTTGCCCTGGA  |
| <b>MMP-9</b>                    | TACCACCTCGAACTTTGACAGCGA | GCCATTACGTCGTCCATTATGCAA  |
| <b><math>\beta</math>-actin</b> | ACCAACTGGGACGACATGGAGAAA | TAGCACAGCCTGGATAGCAACGTA  |

\* cDNA (0.5 $\mu$ l) was mixed with 9 $\mu$ l of double distilled water, 10  $\mu$ l of SYBR Green Master Mix (2 $\times$  PCR buffer, 5 mM MgCl<sub>2</sub>, 0.4 mM each dNTP, 0.05% bovine serum albumin and 1:10000 SYBR Green) (Invitrogen), 0.2 $\mu$ l of each primer (0.1 $\mu$ M) and 0.1  $\mu$ l of Platinum *Taq* (5 U/ $\mu$ l) (Invitrogen). Amplifications were performed in a Mx3000 PCR machine (Stratagene) under the following cycling conditions: denaturation at 95°C for 5 min, followed by 40 cycles at 95°C for 30 s, 60°C for 30 s, and 72°C for 30 s. For each sample, PCR reactions were performed in triplicate. The level of gene expression was determined by interpolation with a standard curve.

**Supplemental Table 4. Summary of Statistical Analysis**

|            | Experimental set                                                                                                                  | Groups                                                                                                                       | Endpoint                                  | Analysis performed                                                                      | Comments                                                                                                                                                                                   |
|------------|-----------------------------------------------------------------------------------------------------------------------------------|------------------------------------------------------------------------------------------------------------------------------|-------------------------------------------|-----------------------------------------------------------------------------------------|--------------------------------------------------------------------------------------------------------------------------------------------------------------------------------------------|
| Analysis 1 | Fig.1 A-C<br>Effect of glucocorticoids on circulating Th1 and Th17 cells                                                          | Controls <sup>a</sup> n=34<br>GCA Patients untreated <sup>b</sup> n=26<br>treated <sup>b</sup> n=34                          | Frequencies of cytokine producing T cells | Customized t-like statistics (see supplement Statistical Methods)                       | <sup>b</sup> 11 patients were enrolled when untreated and analyzed again on therapy. 15 patients were tested only as untreated and 23 patients were only analyzed while on therapy.        |
| Analysis 2 | Fig.1 G-H; Fig. 3 A-C<br>Effect of glucocorticoids on plasma cytokines (IL-17, IFN- $\gamma$ , IL-1 $\beta$ , IL-6, IL-12)        | Controls <sup>a</sup> n=6<br>GCA Patients untreated <sup>b</sup> n=6<br>treated <sup>b</sup> n=6                             | Plasma levels of cytokines                | One-sample t, two-sample t, Behrens-Fisher-Welch, or one-sample Wilcoxon as appropriate | <sup>b</sup> patients were enrolled before treatment and analyzed again on therapy                                                                                                         |
| Analysis 3 | Fig.2 A-B; Fig.4 A-E<br>Effect of glucocorticoids on tissue cytokines (IL-17, IFN-g, IL-1b, IL-6, IL-12p40, IL-12p35, IL-23p19)   | Controls <sup>a</sup> n=8<br>GCA Patients untreated <sup>b</sup> n=8<br>treated <sup>b</sup> n=8                             | Transcript levels of tissue cytokines     | One-sample t, two-sample t, Behrens-Fisher-Welch, or one-sample Wilcoxon as appropriate | <sup>b</sup> samples from untreated and treated patients were paired                                                                                                                       |
| Analysis 4 | Fig.3 D-H<br>Effect of glucocorticoids on cytokine production in peripheral monocytes (IL-1b, IL-6, IL-12p35, IL-12p40, IL-23p19) | Controls <sup>a</sup> n=8<br>GCA Patients untreated <sup>b</sup> n=8<br>treated <sup>b</sup> n=8                             | Transcript levels of cytokines            | One-sample t, two-sample t, Behrens-Fisher-Welch, or one-sample Wilcoxon as appropriate | <sup>b</sup> samples from the untreated and treated patients were paired                                                                                                                   |
| Analysis 5 | Fig.5<br>Effect of glucocorticoids on tissue cytokines in human artery-SCID chimeras.                                             | Control tissues <sup>c</sup> n=9<br>Tissues untreated <sup>d</sup> n=9<br>Tissues treated <sup>d</sup> n=9                   | Transcript levels of tissue cytokines     | One-sample t, two-sample t, Behrens-Fisher-Welch, or one-sample Wilcoxon as appropriate | <sup>c, d</sup> artery tissues were engrafted into mice. Arterial wall inflammation was induced or not (control). Arteries with inflammation were treated with steroids or left untreated. |
| Analysis 6 | Suppl. Fig.3<br>In vitro testing of anti-cytokine antibodies during the induction of Th17 cells                                   | Isotype control <sup>c</sup> n=3<br>Anti-IL-1b <sup>c</sup> n=3<br>Anti-IL-6 <sup>c</sup> n=3<br>Anti-IL-23 <sup>c</sup> n=3 | Frequency of TH17 cells                   | Friedman rank sum test                                                                  | <sup>c</sup> cells were isolated from untreated GCA patients and co-cultured with either isotype control or anti-IL-                                                                       |



|            |                                                                       |                                                                          |  |              |                                                                                                             |
|------------|-----------------------------------------------------------------------|--------------------------------------------------------------------------|--|--------------|-------------------------------------------------------------------------------------------------------------|
|            |                                                                       |                                                                          |  |              | 1b, or anti-IL-6 or anti-IL-23 antibody in tissue culture. Frequencies of induced Th17 cells were measured. |
| Analysis 7 | Table 1<br>Effect of glucocorticoids on the frequencies of Th17 cells | GCA Patients<br>untreated <sup>b</sup> n=11<br>treated <sup>b</sup> n=11 |  | One-sample t | <sup>b</sup> 11 patients were enrolled while untreated and were analyzed again while on therapy.            |

<sup>a</sup> Healthy volunteers served as controls. Age distributions in controls, untreated and treated patients were not significantly different.

**Supplemental Table 5.** The influence of glucocorticoid therapy on the frequency of circulating Th17 cells in individual patients

| Patient | Untreated | Treated                     |                                  |          |
|---------|-----------|-----------------------------|----------------------------------|----------|
|         | Th17 (%)  | Treatment duration (months) | Current prednisone dose (mg/day) | Th17 (%) |
| No. 1   | 2.1       | 2.5                         | 30                               | 0.29     |
| No. 2   | 2.2       | 3                           | 30                               | 0.28     |
| No. 3   | 1.8       | 3                           | 30                               | 0.65     |
| No. 4   | 1.6       | 3.5                         | 20                               | 0.4      |
| No. 5   | 2.5       | 3.5                         | 15                               | 0.45     |
| No. 6   | 1.9       | 5                           | 9                                | 0.39     |
| No. 7   | 4.3       | 6                           | 15                               | 0.53     |
| No. 8   | 2.9       | 6.5                         | 8                                | 0.49     |
| No. 9   | 3.3       | 7                           | 20                               | 0.42     |
| No. 10  | 2.2       | 7                           | 7                                | 0.61     |
| No. 11  | 1.8       | 9                           | 15                               | 0.18     |

## Supplemental Figure 1

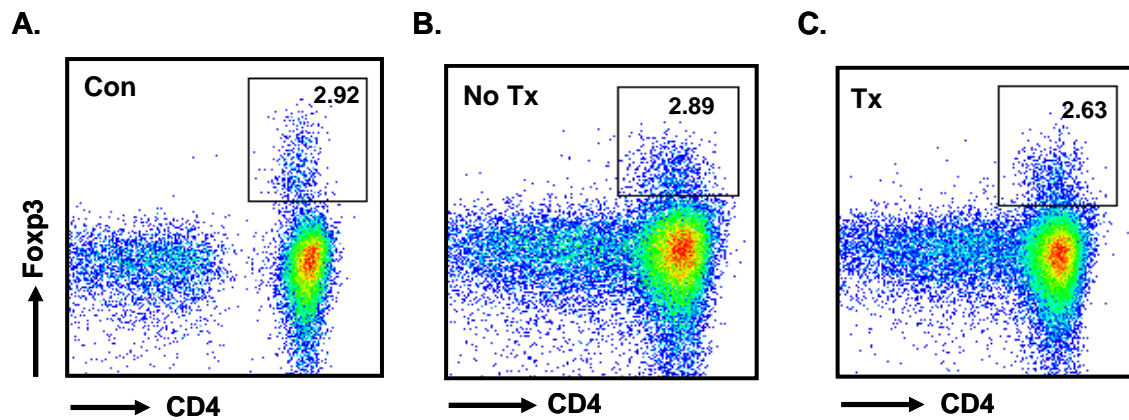

**Supplemental Figure 1. *Foxp3*<sup>+</sup> *CD4* regulatory T-cells in GCA.** PBMC isolated from age-matched control donors (A), untreated (B) and GC-treated GCA patient (C) as described in Figure 1 were stained with FITC anti-CD3, PerCP anti-CD4 and PE anti-Foxp3 antibodies and analyzed by flow cytometry. Representative cytometric dot plots are shown. Frequencies of Foxp3<sup>+</sup> regulatory CD4 T cells amongst CD3 T cells were similar in controls, untreated and treated patients.

## Supplemental Figure 2

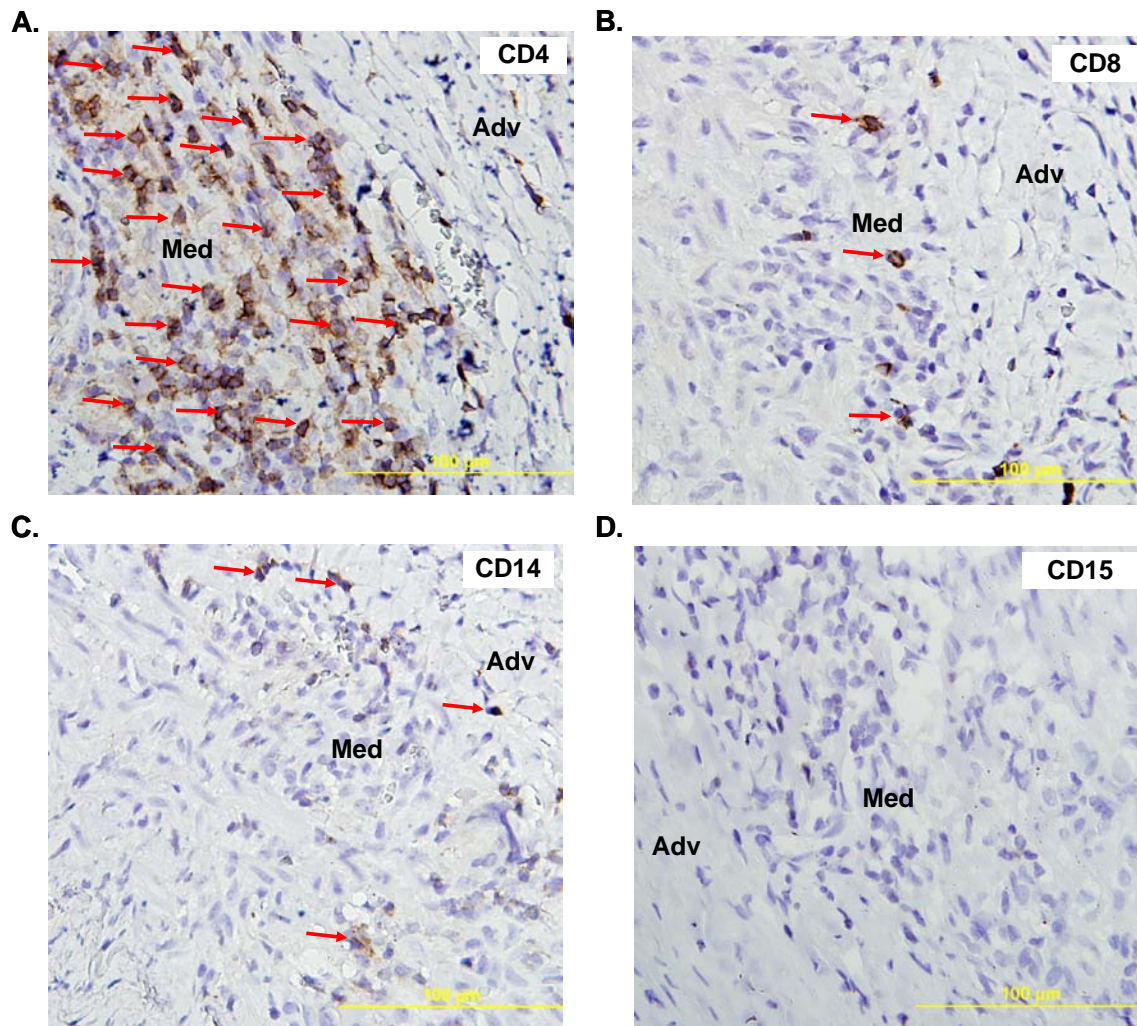

**Supplemental Figure 2. Representation of different cell types in the granulomatous lesions of GCA.** Paraffin-embedded tissue sections of temporal arteries from GCA patients were de-waxed, and stained with mouse anti-human CD4 (A), mouse anti-human CD8 (B), mouse anti-human CD14 (monocyte marker) (C), anti-human CD15 (neutrophil marker) (D) antibodies or purified mouse IgG control (not shown). The images presented are representative of five different biopsy samples. Positive cells are marked by red arrows. Similar to anti-human CD15 staining (D), mouse IgG control showed complete negative. Magnification 600× in (A), (B), (C) and (D).

### Supplemental Figure 3

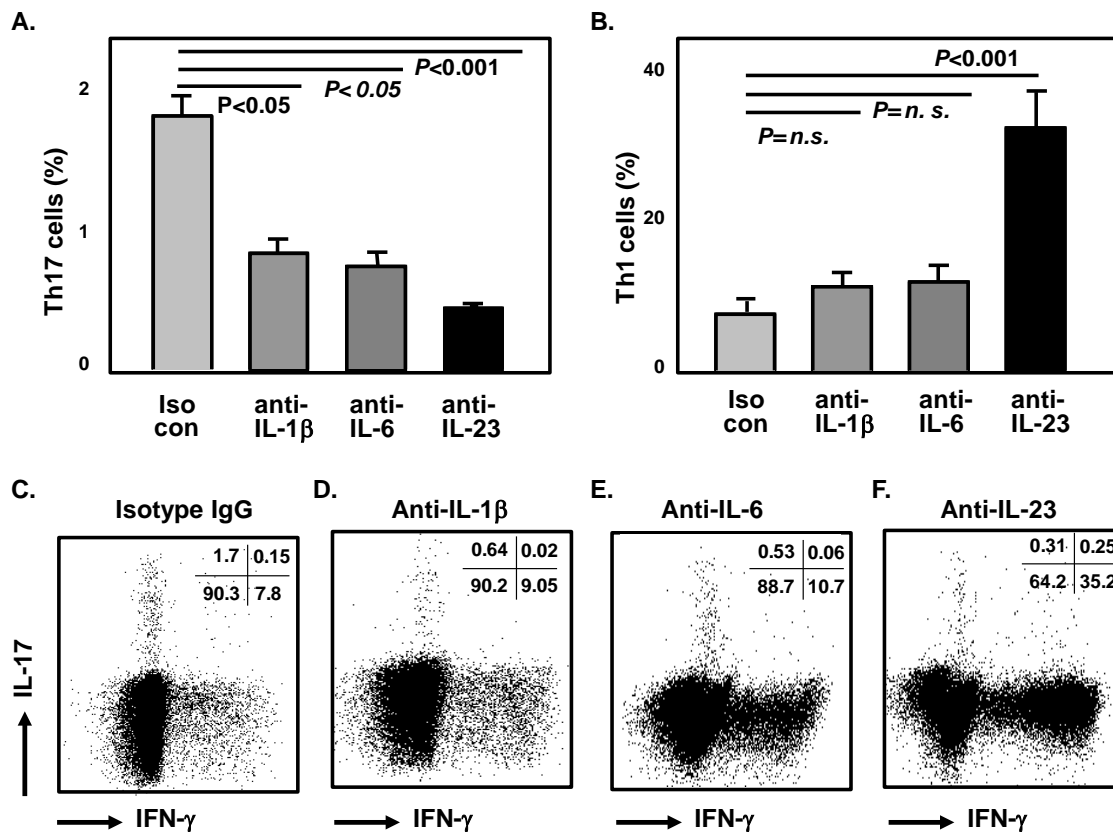

### Supplemental Figure 3. *IL-1 $\beta$ , IL-6, and IL-23 promote Th17 cell differentiation in GCA.*

CD45RO<sup>-</sup> CD4<sup>+</sup> naïve T cells and CD14<sup>+</sup> monocytes were purified from PBMC of GCA patients. Naïve T cells were co-cultured with monocytes at a 2:1 ratio in the presence of anti-CD3 antibodies and LPS for 4 days, supplemented with goat anti-human IL-1 $\beta$ , anti-human IL-6, or anti-human IL-23 neutralizing antibodies, or purified goat IgG isotype control antibody. Cells were stained with PE-conjugated anti-CD3, PerCP-conjugated anti-CD4, FITC-conjugated anti-IFN- $\gamma$ , and APC-conjugated anti-IL-17 antibodies, and analyzed by flow cytometry as described in Figure 1. Frequencies of Th17 (**A**) and Th1 cells (**B**) were analyzed by flow cytometry, and are presented from three independent experiments. (**C-F**) Representatives of cytometric dot

plots from the co-cultured supplemented with goat anti-human IL-1 $\beta$  (D), anti-human IL-6 (E), or anti-human IL-23 (F) neutralizing antibodies, or purified goat IgG isotype control antibody (C).
